# Supplementary material
Source: Elsevier journal article supplement (https://www.sciencedirect.com/science/article/pii/S1576988720300248)
Supplement: mmc1 [file S1576988720300248:mmc1.docx]

**Anexo 1**

**Fiebre para cada Vacuna**

**Vacuna triple vírica y contra la varicela:**

La fiebre suele ser leve-moderada (< 39º), dura de 1 a 3 días y puede aparecer entre el 5º y el 12º día de la inyección. Puede darse en el 10% de los casos.

Existe la vacuna tetravírica que solo se utiliza en niños mayores (2ª dosis de los 3-4 años) por su riesgo de producir fiebre elevada y convulsiones febriles.

**Vacuna contra la difteria, el tétanos, la tos ferina (DTaP)**

Puede aparecer fiebre leve-moderada en el 25% de los niños, aparece a las pocas horas de la inyección y suele durar entre 24 a 48 horas

**Vacuna contra la influenza Hemophilus Tipo B (Hib**

Fiebre leve-moderada en el 2% de los niños.

**Vacuna contra la hepatitis A**

Fiebre leve-moderada en < 5% de los casos.

**Vacuna contra el virus de la hepatitis B (VHB)**

Fiebre leve-moderada en el 3% de los niños.

**Vacuna contra el Virus de la Gripe:**

Fiebre leve-moderada en el 20% de los niños, en niños pequeños.

**Vacuna meningocócica C**

Fiebre leve-moderad en el 5%

**Vacuna meningocócica B**

Fiebre leve-moderada en el 50%

**Vacuna contra el virus del papiloma:**

Fiebre leve-moderada en el 10% y fiebre alta (>39ºC) en un 2%.

**Vacuna neumocócica conjugada:**

Fiebre leve-moderada en un 15%, de presentación a las pocas horas y durante 1-2 días.
